# Supplementary material for: Contributions of altered permeability of intestinal barrier and defecation behavior to toxicity formation from graphene oxide in nematode Caenorhabditis elegans
Source: Royal Society of Chemistry journal article supplement (doi:10.1039/c3nr02084c), 2013-01-01
Supplement: c3nr02084c.pdf [file c3nr02084c.pdf]

**Research Paper; Submitted to “Nanoscale”**

---

**Supporting information:**

**Supplementary Figure 1:**



**Fig. S1** TEM image of GO in K medium. Before observation, GO in K medium was sonicated.

Research Paper; Submitted to "Nanoscale"

Supplementary Figure 2:



**Fig. S2** Effects of GO exposure on lethality (a) and growth (b) of *C. elegans*. Exposure to GO was performed from L4-larvae for 24-hr (acute exposure) or from L1-larvae to adult (prolonged exposure). Bars represent means  $\pm$  S.E.M. \*\*  $p < 0.01$ .

Research Paper; Submitted to "Nanoscale"

Supplementary Figure 3:



**Fig. S3** Effects of GO exposure on lifespan of *C. elegans*. Exposure to GO was performed from L4-larvae for 24-hr (acute exposure) or from L1-larvae to adult (prolonged exposure).

Supplementary Figure 4:



**Fig. S4** Transgenerational effects of prolonged GO exposure on growth of *C. elegans*. Prolonged exposure to GO was performed from L1-larvae to adult. F1 and F2 progeny nematodes were cultured on normal NGM plates. Bars represent means  $\pm$  S.E.M. \*\*  $p < 0.01$ .

**Research Paper; Submitted to “Nanoscale”**

---

**Supplementary Table 1:**

**Table S1.** Information on genes required for oxidative stress control in *C. elegans*

| Gene         | Products of the genes                                        |
|--------------|--------------------------------------------------------------|
| <i>sod-1</i> | copper/zinc superoxide dismutase                             |
| <i>sod-2</i> | manganese - superoxide dismutase                             |
| <i>sod-3</i> | manganese - superoxide dismutase                             |
| <i>sod-4</i> | copper/zinc superoxide dismutase                             |
| <i>sod-5</i> | copper/zinc superoxide dismutase                             |
| <i>isp-1</i> | “Rieske” iron-sulfur protein                                 |
| <i>mev-1</i> | a subunit of the enzyme succinate dehydrogenase cytochrome b |
| <i>gas-1</i> | subunit of mitochondrial complex I                           |
| <i>clk-1</i> | ubiquinone biosynthesis protein COQ7                         |
| <i>ctl-1</i> | catalase                                                     |
| <i>ctl-2</i> | catalase                                                     |
| <i>ctl-3</i> | catalase                                                     |

**Research Paper; Submitted to “Nanoscale”**

---

**Supplementary Table 2:**

**Table S2** Association of intestinal ROS production with the toxicity from prolonged exposure to GO in *C. elegans*

| Dependent variable          | Independent variable      |           |
|-----------------------------|---------------------------|-----------|
|                             | Intestinal ROS production |           |
|                             | $R^2$                     | $p$ value |
| Body length                 | 0.827                     | < 0.05    |
| Brood size                  | 0.839                     | < 0.05    |
| Body bend                   | 0.810                     | < 0.05    |
| Head thrash                 | 0.929                     | < 0.01    |
| Intestinal autofluorescence | 0.966                     | < 0.01    |

**Research Paper; Submitted to “Nanoscale”**

**Supplementary Table 3:**

**Table S3.** Information on genes required for intestinal development in *C. elegans*

| Gene           | Products of the genes                                                                                     |
|----------------|-----------------------------------------------------------------------------------------------------------|
| <i>gem-4</i>   | Ca <sup>2+</sup> -dependent phosphatidylserine binding protein                                            |
| <i>mtm-6</i>   | myotubularin lipid phosphatase orthologous                                                                |
| <i>nhx-2</i>   | sodium/proton exchanger                                                                                   |
| <i>opt-1</i>   | high-affinity, proton-coupled oligopeptide transporter                                                    |
| <i>pkc-3</i>   | atypical protein kinase                                                                                   |
| <i>par-3</i>   | PDZ domain-containing protein orthologous                                                                 |
| <i>par-6</i>   | PDZ-domain-containing protein                                                                             |
| <i>pgp-1</i>   | transmembrane protein                                                                                     |
| <i>pgp-3</i>   | transmembrane protein                                                                                     |
| <i>vha-6</i>   | membrane-bound (V0) domain of vacuolar proton-translocating ATPase (V-ATPase);                            |
| <i>gtl-1</i>   | TRPM subfamily member of the TRP channel family                                                           |
| <i>erm-1</i>   | ortholog of the ERM family of cytoskeletal linkers                                                        |
| <i>eps-8</i>   | homolog of mouse epidermal growth factor receptor kinase substrate                                        |
| <i>act-5</i>   | ortholog of human cytoplasmic actin                                                                       |
| <i>ifb-2</i>   | nonessential intermediate filament protein                                                                |
| <i>dlg-1</i>   | MAGUK protein                                                                                             |
| <i>ajm-1</i>   | member of the apical junction molecule class                                                              |
| <i>egl-8</i>   | phospholipase C beta homolog                                                                              |
| <i>let-413</i> | protein with strong similarity to human ERBIN, rat DENSIN, Drosophila SCRIB and its human ortholog hSCRIB |
| <i>nfm-1</i>   | homolog of human merlin/schwannomin (NF2)                                                                 |
| <i>inx-3</i>   | gap protein                                                                                               |
| <i>nhx-4</i>   | sodium/proton exchanger                                                                                   |

**Research Paper; Submitted to “Nanoscale”**

---

*abts-4*

anion transporter

---

**Research Paper; Submitted to “Nanoscale”**

**Supplementary Table 4:**

**Table S4.** Information on genes required for defecation in *C. elegans*

| Gene           | Products of the genes                                                                    |
|----------------|------------------------------------------------------------------------------------------|
| <i>unc-16</i>  | homolog of murine JIP3 (c-Jun N-terminal kinase (JNK)-interacting protein 3              |
| <i>unc-33</i>  | homolog of murine JIP3 (c-Jun N-terminal kinase (JNK)-interacting protein 3              |
| <i>unc-44</i>  | ankyrin-like protein                                                                     |
| <i>unc-101</i> | adaptin orthologous to the mu1-I subunit of adaptor protein complex 1 (AP-1)             |
| <i>aex-1</i>   | novel, C2 calcium-binding domain protein                                                 |
| <i>aex-3</i>   | guanine nucleotide exchange factor                                                       |
| <i>aex-5</i>   | ortholog of calcium-dependent serine endoproteases                                       |
| <i>cab-1</i>   | novel protein with a C-terminal motif weakly homologous                                  |
| <i>egl-36</i>  | Shaw-type voltage-gated potassium channel                                                |
| <i>unc-2</i>   | calcium channel alpha subunit                                                            |
| <i>unc-36</i>  | alpha2/delta subunit of a voltage-gated calcium channel                                  |
| <i>unc-13</i>  | protein that regulates neurotransmitter release                                          |
| <i>fat-3</i>   | delta-6 fatty acid desaturase ('linoleoyl-CoA desaturase')                               |
| <i>egl-30</i>  | ortholog of heterotrimeric G protein alpha subunit Gq (Gq/G11 class)                     |
| <i>exp-2</i>   | member of the six-transmembrane voltage-activated (Kv-type) family of potassium channels |
| <i>unc-43</i>  | type II calcium/calmodulin-dependent protein kinase (CaMKII)                             |
| <i>egl-2</i>   | voltage-gated potassium channel                                                          |
| <i>sup-9</i>   | TWK (two-P domain K <sup>+</sup> ) potassium channel subunits                            |
| <i>sup-10</i>  | potassium channel                                                                        |
| <i>unc-93</i>  | transmembrane protein                                                                    |

**Research Paper; Submitted to “Nanoscale”**

---

|               |                                                                                            |
|---------------|--------------------------------------------------------------------------------------------|
| <i>unc-25</i> | GABA neurotransmitter biosynthetic enzyme, glutamic acid decarboxylase (GAD)               |
| <i>lim-6</i>  | LIM class homeodomain protein                                                              |
| <i>unc-47</i> | transmembrane vesicular GABA transporter                                                   |
| <i>gat-1</i>  | electrogenic, Na <sup>+</sup> /Cl <sup>-</sup> -coupled, high-affinity GABA transporter    |
| <i>hlh-8</i>  | helix-loop-helix protein                                                                   |
| <i>exp-1</i>  | excitatory, cation-selective GABA receptor                                                 |
| <i>tax-6</i>  | ortholog of calcineurin A                                                                  |
| <i>dsc-1</i>  | transcription factor CHX10 and related HOX domain proteins                                 |
| <i>fkr-1</i>  | ion channel                                                                                |
| <i>fkr-4</i>  | predicted Ser/Thr protein kinase                                                           |
| <i>iri-1</i>  | tam3-transposase (Ac family)                                                               |
| <i>smp-1</i>  | semaphorin                                                                                 |
| <i>itr-1</i>  | putative inositol (1,4,5) trisphosphate receptor                                           |
| <i>plc-3</i>  | phospholipase C gamma homolog                                                              |
| <i>vav-1</i>  | Rho/Rac-family guanine nucleotide exchange factor<br>orthologous to the Vav proto-oncogene |
| <i>ced-10</i> | GTPase orthologous to human RAC1                                                           |
| <i>mig-2</i>  | member of the Rho family of GTP-binding proteins                                           |
| <i>rho-1</i>  | Rho GTPase                                                                                 |
| <i>crt-1</i>  | ortholog of calreticulin                                                                   |
| <i>shn-1</i>  | Scaffold protein Shank and related SAM domain proteins                                     |
| <i>elo-1</i>  | C-18 polyunsaturated fatty acid (PUFA) elongase                                            |
| <i>fat-2</i>  | delta-12 fatty acyl desaturase                                                             |
| <i>dsc-4</i>  | subunit of the microsomal triglyceride transfer protein                                    |
| <i>tpk-1</i>  | Thiamin pyrophosphokinase                                                                  |
| <i>clk-1</i>  | ubiquinone biosynthesis protein COQ7                                                       |
| <i>isp-1</i>  | “Rieske” iron-sulfur protein                                                               |

---

Supplementary Table 5:

**Table S5.** Primers used for quantitative real-time polymerase chain reaction (PCR)

| Gene         | Forward primer           | Reverse primer           |
|--------------|--------------------------|--------------------------|
| <i>act-1</i> | CTGCAGATGTGTGACGACGAGGTT | CTGCAGGAAGCACTTGCGGTGAAC |
| <i>clk-1</i> | CACATACTGCTGCTTCTCGT     | TGAACCAACAGATGAACCTT     |
| <i>ctl-1</i> | CTCCTACACGGACACGCAT      | GCATCTCCCTGGCTTTCAT      |
| <i>ctl-2</i> | CGAACAGCTTCAACTATGG      | GTGGCTGGGAATGTGGTAT      |
| <i>ctl-3</i> | TTCTCCTACACGGACACGC      | GCATCTCCCTGGCTTTCAT      |
| <i>gas-1</i> | CTTGGTCTTTGGCTGTTGA      | CTTGGTCTTTGGCTGTTGA      |
| <i>isp-1</i> | GCAGAAAGATGAATGGTCC      | CAGAAGCGTCGTAGTGAGA      |
| <i>mev-1</i> | GGAATTCGCTTCTTAGGAT      | GCAGTCTTGTTGCTCTTGT      |
| <i>sod-1</i> | ACGCTCGTCACGCTTTAC       | TCTTCTGCCTTGTCTCCG       |
| <i>sod-2</i> | GGCATCAACTGTCGCTGT       | ACAAGTCCAGTTGTTGCC       |
| <i>sod-3</i> | TGACATCACTATTGCGGT       | GGGACCATTCCCTTCCAAA      |
| <i>sod-4</i> | CACCAGATGACTCGAACA       | AATGAGGCAAGAGAGTCG       |
| <i>sod-5</i> | ATATTGCCAATGCCGTTT       | CTCTTCACCTTCGGCTTT       |
| <i>gem-4</i> | CACGGTGGTCAACAGTAT       | TTGTATTTGGCACCTTTC       |
| <i>mtm-6</i> | AAAAGGGACGCTAACAGC       | ATTCTCAAACGCAAGCAG       |
| <i>nhx-2</i> | GGAGCAGAATGTGAAGAA       | GTGGCGGAAGTAGATAAA       |
| <i>opt-1</i> | TGATGTCCGTTCCCTACT       | ATGACCTGAAAGAGTGGG       |
| <i>pho-1</i> | ACGGACATGATGTAGGAG       | ATTAGAAGTGCGGAGAAG       |
| <i>pkc-3</i> | CGTCTCCGACATCATTAG       | CAACTCGGCTTCTTGACT       |
| <i>par-3</i> | AAGCGTAACTGTCAACCA       | CCGTCTATAACATCCTCC       |
| <i>par-6</i> | ATTCTGCGTCTGGTGTCT       | TTCCCTTCCATCGTTTAT       |
| <i>pgp-1</i> | AATGTCCGATTCGCTTAC       | CTCAGGGTTCAACGTCTT       |
| <i>pgp-3</i> | GGACTTCCTGACGGTTAC       | TTTGATGGGTTCTTCTT        |
| <i>vha-6</i> | ATGGAGGCAAACCTTAGAG      | TTCCGAGATTGACATAGC       |
| <i>gtl-1</i> | CTGCTCACCACGCACAAT       | AACTCCTTCATCCAACCC       |

**Research Paper; Submitted to “Nanoscale”**

---

|                |                    |                     |
|----------------|--------------------|---------------------|
| <i>erm-1</i>   | TCCACGACTCCGTATCAA | TCCTGCTCGGCAATCTTA  |
| <i>eps-8</i>   | ACGCAGTGACGGTAGAAG | AGCGGATACACGGATAACA |
| <i>act-5</i>   | GGGAGTGATGGTCGGTAT | CGGTAAGGAGAACTGGGT  |
| <i>ifb-2</i>   | TCAAGGCTGAATACGACA | TCCAAAGCAGAGTTACGG  |
| <i>dlg-1</i>   | TTGAAACGGCGTAAAGAT | CGTGATGAACTGGTGGTG  |
| <i>ajm-1</i>   | GTCAATCAGTTCGTCCCG | ACTCGTCCGATGGTGTCT  |
| <i>egl-8</i>   | GCTCGATGGCTTCAAGTA | TGAATGCTATCCCTCTGC  |
| <i>let-413</i> | TTGCGTCCAACAAGTTAC | CACCAAGAAATGCTCCTC  |
| <i>nfm-1</i>   | ATTACGGAGGATCTGGTA | TCATCGTCGTGAACTTAT  |
| <i>inx-3</i>   | CAGTGGGTGCCTATTGTG | GACCGTATTCGTTCTTGG  |
| <i>nhx-4</i>   | GAAGATTGCTACCTGGAC | TCATAAGTGGGTGTTCTT  |
| <i>abts-4</i>  | CTCAGACTACAGGGATGG | GTGCCTGACTCACAAGAC  |
| <i>unc-16</i>  | CTCGGTGCTGATCTCACA | GCGTCTTAATCTCCTCCT  |
| <i>unc-33</i>  | CTCCCTGACAGACGATAA | CAGACTCCGCTAACCTTA  |
| <i>unc-44</i>  | TCCCAGACGGATCACTTA | ATTCCACGGTTGTTACTT  |
| <i>unc-101</i> | CGGAAATTGTTGGAAGCG | CGGGCGGTATGAAGGAGA  |
| <i>aex-1</i>   | TGGAGCAAGAAGACCACT | GCGAATCTCCGATAACCT  |
| <i>aex-3</i>   | ATTACTGGGCGATGGGTG | TGGCGAACGAGTGGATTG  |
| <i>aex-5</i>   | AATGTGCTGGATTGGTAG | GCAATGCTCCATTCTTAA  |
| <i>cab-1</i>   | AATGCCGCTGTCAAGGAT | GTCTGCATCGCACTTTCG  |
| <i>egl-36</i>  | TGCCAGTTCCTGTTATCG | CTCCTAACCTCCCTGTG   |
| <i>unc-2</i>   | CAACGCTCAGGAACTCAC | AATCAGAACTCGGAATGG  |
| <i>unc-36</i>  | CTCGCCACTTATGTCTCC | TCTTCAACTCGGCTCTTG  |
| <i>unc-13</i>  | AGTGAGCCGCTTTCTTAT | AATCCTCCACCACTTCA   |
| <i>fat-3</i>   | ACTCATCACGCTGCCACA | TACCCAAGCCCAATGTCC  |
| <i>egl-30</i>  | AAGAGCTATGGGAGGATT | CACCAGGAACATGATTGA  |
| <i>exp-2</i>   | GCGGCATATTGGTGGTGT | TTGCTCGCTTTGCTGGTC  |
| <i>unc-43</i>  | ATTGGCAGGTGCTATTGA | TGCTGGCTGTAGATGAGT  |
| <i>egl-2</i>   | CCTATTTGGCTTCTGGTC | TGTAGATCCTTCGTTTCG  |

**Research Paper; Submitted to “Nanoscale”**

|               |                    |                      |
|---------------|--------------------|----------------------|
| <i>sup-9</i>  | GAAGATGAACGGAGGGAT | CTTTCTGTGACGGTGTCG   |
| <i>sup-10</i> | TTACCGACAAGCAGTTTC | CAAGATGGCTGAGGACAC   |
| <i>unc-93</i> | ACTACTTGTCGGTGTGTA | AAATACTTTGGGCTCCTC   |
| <i>unc-25</i> | CGGCTCAACTGTCTACGG | TGGAGAAGTGCTCCCATG   |
| <i>lim-6</i>  | GTTCTGGTTGTGGGTGTC | ATAGCATTGATGGTCGT    |
| <i>unc-47</i> | TGGTCAAGGCTCTTCTAT | TTTCCAATAATCCCATC    |
| <i>gat-1</i>  | AAAGTGTAGCCGAAGTAG | AACTCGTCAATGATAGCG   |
| <i>hlh-8</i>  | GTCAAAGGACCAAGGAAC | TGAAAGCCGACTGTAAAT   |
| <i>exp-1</i>  | CATCGACCAGAAATGACA | AACAACCTCAAAGCGTAA   |
| <i>tax-6</i>  | TGGAAAGATGGCAAGAGC | CGTTTGTCTGACGGAAT    |
| <i>dsc-1</i>  | CGTATCACGGTATGGTTT | GATGCTCCTGTAGGCTTG   |
| <i>flr-1</i>  | TCACGGACTTGTGAGAAT | TGGTGTTTCCAGAGGGTTTA |
| <i>flr-4</i>  | TCCACCAGTCATTCATCG | CAGAACCTCAGGAGCCAC   |
| <i>iri-1</i>  | AATAACGGCAGCACCTAA | GAAAGTCGTCGTGTCAAA   |
| <i>smp-1</i>  | CGGCAATGATGCTCTTAT | CTCCTCCTTTGTCTTTTT   |
| <i>itr-1</i>  | ATGGCAGGTCTTTATGTT | GAATCGGTATGCTTTGTT   |
| <i>plc-3</i>  | GTCATCTATCACGGGTAT | TCTATCGGCAACTTCTTA   |
| <i>vav-1</i>  | GTAATGGAGGATGTCTGC | TATAGCGTTGCTTAGGTT   |
| <i>ced-10</i> | ATAAATCTCGGGCTCTGG | AGCACCGTACACTTGCTC   |
| <i>mig-2</i>  | ACAATGTGGCAAGCAAGT | TTTCGGATGAAGAATGGA   |
| <i>rho-1</i>  | ATTGAAGTTGACGGAAAG | TAATCGGAACATTTGGAC   |
| <i>crt-1</i>  | CTGTGGAGGTGGATACGT | GTCGGAGTTGAGGATGAG   |
| <i>shn-1</i>  | AGGAGGAAAGGTCAACGG | GTCGGAACGGCCTAGAAT   |
| <i>elo-1</i>  | CCGTTCTTGCTCATCTTG | TTTGGCACTGCCTTGAC    |
| <i>fat-2</i>  | ACATTGCCTTTGTCCTCT | TGTCGATAGTTTGGGTTT   |
| <i>dsc-4</i>  | GGCTTCCCTCTACCATCA | GAATCGTCGAGTCATCCA   |
| <i>tpk-1</i>  | TAACGGTGAACCTACGGC | TCAGGCAGATGGACGACT   |
| <i>clk-1</i>  | GTGTCGGTTCAGCACTTC | GAGCCTTCATTCCATCGT   |
| <i>isp-1</i>  | GTACCAAGGCTGAGATTG | CAGAAGCGTCGTAGTGAG   |
